# Supplementary material for: Low-Temperature Toluene Oxidation on Fe-Containing Modified SBA-15 Materials
Source: MDPI journal article supplement (doi:10.3390/molecules28010204), 2022-12-26
Supplement: s1 [file s1]

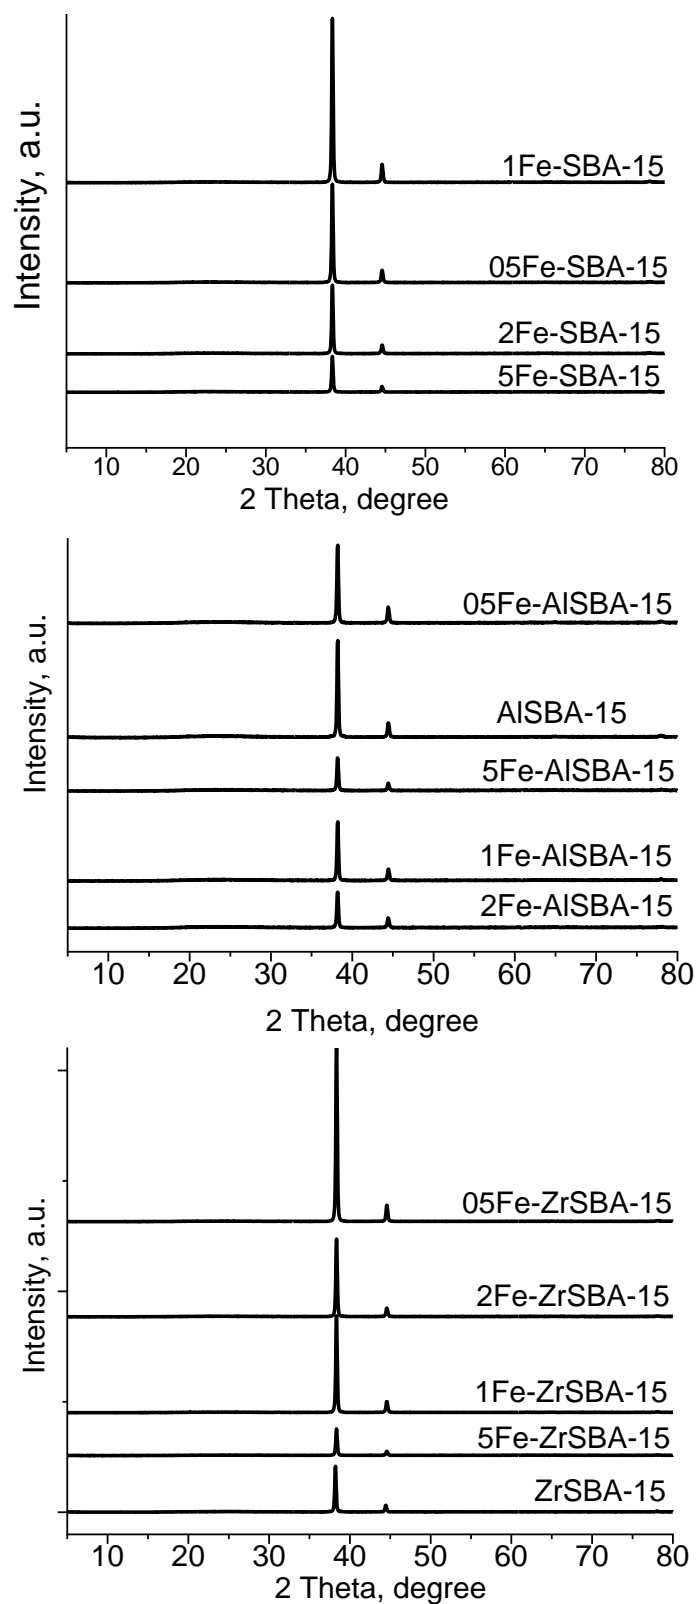

Figure S1. Figure S1. XRD patterns of iron modified SBA-15 (A), AlSBA-15 (B) and Zr-SBA-15 (C) samples.

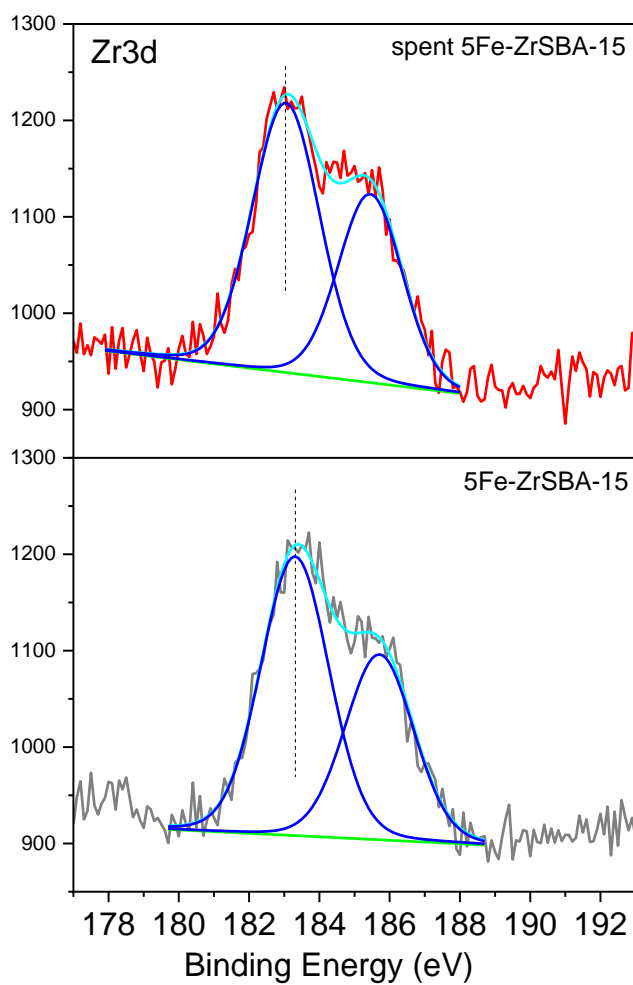

Figure S2. Zr3d XPS spectra of initial and spent 5Fe-ZrSBA-15 sample.
